# Supplementary material for: Anti-Metastatic Effects of Standardized Polysaccharide Fraction from Diospyros kaki Leaves via GSK3β/β-Catenin and JNK Inactivation in Human Colon Cancer Cells
Source: MDPI journal article supplement (doi:10.3390/polym16091275), 2024-05-03
Supplement: s1 [file s1]

## Supplementary Data

**Supplementary Table S1.** Antibodies used in the western blot analysis

| Supplier                     | Location               | Antibodies                                                                                                                                                                                                                                                |
|------------------------------|------------------------|-----------------------------------------------------------------------------------------------------------------------------------------------------------------------------------------------------------------------------------------------------------|
| Santa Cruz<br>Biotechnology  | Santa Cruz,<br>CA, USA | MMP-9 (sc-21733), TIMP-1 (sc-5538), $\beta$ -catenin (sc-376841), GSK3 $\beta$ (sc-81462), p-c-Jun (sc-822), c-Jun (sc-74543), c-Fos (sc-253), p-JNK (sc-6254), p-ERK (sc-7383), JNK (sc-7345), ERK (sc-94), p65 (sc-8008), and $\beta$ -actin (sc-81178) |
| Cell signaling<br>Technology | Danvers,<br>MA, USA    | MMP-2 (#4022), p-GSK3 $\beta$ (#5558), p-c-Fos (#5348), p-p65 (#3033), p38 (#9211), and p-p38 (#9215)                                                                                                                                                     |

**Supplementary Table S2.** Oligonucleotide primer sequences for qRT-PCR

| Gene                            | Forward               | Reverse              |
|---------------------------------|-----------------------|----------------------|
| <i>E-cadherin</i>               | TCTTCTCCGCCTCCTTCTTC  | AATTCCTGCCATTCTGGGGA |
| <i>N-cadherin</i>               | TGAGCCTGAAGCCAACCTTA  | AGGTCCCCTGGAGTTTTCTG |
| <i>Vimentin</i>                 | AGCTAACCAACGACAAAGCC  | TCCACTTTGCGTTCAAGGTC |
| <i>TIMP-1</i>                   | CTGGAAAACCTGCAGGATGGA | GTGCATTCTCACAGCCAAC  |
| <i>MMP-2</i>                    | ACCGCGACAAGAAGTATGGC  | CCACTTGCGGTCATCATCGT |
| <i>MMP-9</i>                    | CGATGACGAGTTGTGGTCCC  | TCGTAGTTGGCCGTGGTACT |
| <i><math>\beta</math>-actin</i> | ATCACTATTGGCAACGAGCG  | TCAGCAATGCCTGGGTACAT |
